# Supplementary material
Source: PubMed Central journal article supplement (PMC3868305)
Supplement: Supp_App1.pdf [file Supp_App1.pdf]

**Appendix 1. Notes for the annotation of the type I IFN genes in Eca2.0**

| Order                                                                                            | Gene annotation | Suggested name | NW_001867394.1 Reference Sequence Original annotation | Reference Sequence New annotation | Length | Locus        | mRNA Reference Assembly | Notes |
|--------------------------------------------------------------------------------------------------|-----------------|----------------|-------------------------------------------------------|-----------------------------------|--------|--------------|-------------------------|-------|
| <u>EquCab2.0 — Equus caballus breed thoroughbred chromosome 23 genomic scaffold NW_001867394</u> |                 |                |                                                       |                                   |        |              |                         |       |
| 1                                                                                                | nu pseudo       | IFNNP          | n/a                                                   | 40074597..40075182,complement     | 586    | n/a          |                         |       |
| 2                                                                                                | beta            | IFNB1          | 40099096..40099656,complement                         | 40099096..40099656,complement     | 561    | LOC100147174 | XM_001917573.1          | 1     |
| 3                                                                                                | mu              | IFNM1          | 40117735..40118292,complement                         | 40117735..40118292,complement     | 558    | LOC100064612 | XM_001495466.2          |       |
| 4                                                                                                | omega           | IFNW1          | 40119577..40122215                                    | 40121629..40122215                | 587    | LOC100064646 |                         | 2, 3  |
| 5                                                                                                | omega           | IFNW2          | 40152950..40153537,complement                         | 40152950..40153537,complement     | 588    | IFN-OMEGA2   | NM_001114536.1          |       |
| 6                                                                                                | omega pseudo    | IFNWP3         | n/a                                                   | 40162981..40163571,complement     | 591    | n/a          |                         |       |
| 7                                                                                                | alpha           | IFNA1          | 40167843..40168397,complement                         | 40167843..40168397,complement     | 555    | IFN-ALPHA2   | NM_001114537.1          |       |
| 8                                                                                                | omega           | IFNW4          | 40177599..40178186,complement                         | 40177599..40178186,complement     | 588    | LOC100629859 | XM_003363959.1          |       |
| 9                                                                                                | omega pseudo    | IFNWP5         | 40187425..40189448,complement                         | 40187380..40187946,complement     | 567    | LOC100629844 |                         | 4     |
| 10                                                                                               | alpha           | IFNA2          | 40194470..40195024,complement                         | 40194470..40195024,complement     | 555    | LOC100052921 | NM_001114538.1          |       |
| 11                                                                                               | delta           | IFND1          | 40202736..40203239,complement                         | 40202736..40203239,complement     | 504    | LOC100629885 | XM_003363960.1          |       |
| 12                                                                                               | omega           | IFNW6          | 40240969..40241556                                    | 40240969..40241556                | 588    | LOC100052971 | XM_001497454.1          |       |
| 13                                                                                               | delta pseudo    | IFNDP2         | 40242661..40245015                                    | 40244519..40245015                | 497    | LOC100629867 |                         | 5     |
| 14                                                                                               | alpha           | IFNA3          | 40250915..40251507                                    | 40250929..40251483                | 555    | LOC100629951 | XM_003363961.1          | 6     |
| 15                                                                                               | omega pseudo    | IFNWP7         | n/a                                                   | 40254018..40254568                | 551    | n/a          |                         |       |
| 16                                                                                               | omega           | IFNW8          | 40283225..40283812                                    | 40283225..40283812                | 588    | LOC100053069 | XM_001497499.1          |       |
| 17                                                                                               | delta           | IFND3          | 40302973..40303721                                    | 40303189..40303692                | 504    | IFND1        | NM_001143795.1          | 7     |
| 18                                                                                               | alpha           | IFNA4          | 40310846..40311414                                    | 40310846..40311400                | 555    | LOC100053110 |                         | 8     |
| 19                                                                                               | delta           | IFND4          | 40338185..40338828                                    | 40338316..40338828                | 513    | IFND2        | NM_001143796.1          | 9     |
| 20                                                                                               | alpha           | IFNA5          | 40343979..40344533                                    | 40343979..40344533                | 555    | IFNA1        | NM_001099441.1          |       |
| 21                                                                                               | omega pseudo    | IFNWP9         | 40348157..40348565                                    | 40348098..40348656                | 559    | LOC100629915 |                         | 10    |
| 22                                                                                               | alpha           | IFNA6          | 40352208..40352776                                    | 40352208..40352762                | 555    | LOC100053210 |                         | 11    |
| 23                                                                                               | omega           | IFNW10         | 40364703..40365290                                    | 40364703..40365290                | 588    | LOC100053263 | XM_001497725.1          |       |
| 24                                                                                               | epsilon         | IFNE           | 40388377..40389005,complement                         | 40388424..40389005,complement     | 582    | LOC100065067 |                         | 12    |
| 25                                                                                               | kappa           | IFNK           | 45255309..45255935                                    | 45255309..45255935                | 627    | LOC100067055 | XM_001497183.1          |       |

NW\_001868480.1 Equus caballus breed thoroughbred unplaced genomic scaffold

|   |       |        |                         |                         |     |              |                |       |
|---|-------|--------|-------------------------|-------------------------|-----|--------------|----------------|-------|
| 1 | beta  | IFNB2  | 3441..4001,complement   | 3441..4001,complement   | 561 | IFNB1        | NM_001099440.1 |       |
| 2 | mu    | IFNM2  | 24208..24765,complement | 24208..24765,complement | 558 | LOC100064468 | XM_001495370.2 |       |
| 3 | omega | IFNW11 | 27968..28555            | 27968..28555            | 588 | IFN-OMEGA1   | NM_001083595.1 | 13    |
| 4 | beta  | IFNB3  | 50626..63342,complement | 50626..51186,complement | 561 | LOC100052658 | XM_001496900.2 | 14    |
| 5 | mu    | IFNM3  | 69398..69955,complement | 69398..69955,complement | 558 | LOC100064551 | XM_001916512.2 |       |
| 6 | omega | IFNW12 | 71734..73877            | 73291..73877            | 587 | LOC100064579 |                | 2, 15 |
| 7 | beta  | IFNB4  | 88573..89133,complement | 88573..89133,complement | 561 | LOC100052708 | XM_001496994.1 |       |

## Notes

- 1: does not match any Beta from Eca1.1
- 2: these are far too highly conserved to be pseudogenes, and may therefore be coding genes with 2 sequencing errors
- 3: original has extra 2052 at start; has wrong start codon (ACG, as also in Eca1.1); in version Eca1.1 there was an extra A (position 224)  
which is needed to maintain the reading frame
- 4: original has extra 1502 at start, and is missing 45 at end
- 5: original has extra 1858 at start
- 6: original has extra 14 at start and 24 extra nt at end
- 7: original has extra 216 nt at start and 29 nt at the end
- 8: original has 14 extra nt at end
- 9: original has extra 131 nt at start
- 10: original is missing 59 nt at start, and is missing 91 at end
- 11: original has 14 extra nt at end
- 12: original has extra 47 nt at end
- 13: differs strongly from most other Omega sequences; the final 70% of the amino acids match extremely well, but the first 30% less well
- 14: original has extra 12156 nt at start
- 15: original has extra 1557 at start; has wrong start codon (ACG); in version Eca1.1 there was an extra A (position 224)  
which is needed to maintain the reading frame

n/a not applicable
