# Supplementary material
Source: PubMed Central journal article supplement (PMC3868305)
Supplement: Supp_App2.pdf [file Supp_App2.pdf]

## Appendix 2. List of identified IFN- $\mu$ sequences

| Species                       | Accession    | Position                   | Current annotation        | Note       | Taxonomy                                                        |
|-------------------------------|--------------|----------------------------|---------------------------|------------|-----------------------------------------------------------------|
| <i>Equus caballus</i>         | XM_001495370 | LOC100064468               | interferon_alpha_2_like   |            | Mammalia; Eutheria; Laurasiatheria; Perissodactyla              |
|                               | XM_001495466 | LOC100064612               | interferon_alpha_14_like  |            |                                                                 |
|                               | XM_001916512 | LOC100064551               | interferon_alpha_2_like   |            |                                                                 |
| <i>Bos taurus</i>             | XM_001254772 | LOC787343                  | interferon_alpha_14_like  |            | Mammalia; Eutheria; Laurasiatheria; Cetartiodactyla; Ruminantia |
|                               | XM_595271    | LOC517108                  | interferon_alpha_14_like  |            |                                                                 |
|                               | NC_007306    | LOC787459                  | interferon_alpha-2-like   | pseudogene |                                                                 |
|                               | NC_007306    | LOC787382                  | interferon_alpha-2-like   | pseudogene |                                                                 |
| <i>Sus scrofa</i>             | NC_007306    | LOC787588                  | interferon_alpha-2-like   | pseudogene |                                                                 |
|                               | NM_001166320 | IFN_ALPHAOMEGA             | interferon_alphaomega     |            | Mammalia; Eutheria; Laurasiatheria; Cetartiodactyla; Suina      |
|                               | AC135219     | Position101488..102045     | assembly_fragment         |            |                                                                 |
| <i>Ailuropoda melanoleuca</i> | XM_002918530 | LOC100476812               | interferon_alpha_14_like  |            | Mammalia; Eutheria; Laurasiatheria; Carnivora; Caniformia       |
| <i>Canis lupus familiaris</i> | XM_003431595 | LOC100686162               | interferon_alpha-2-like   |            | Mammalia; Eutheria; Laurasiatheria; Carnivora; Caniformia       |
| <i>Felis catus</i>            | AC145446     | Position59440..59991       | clone RP86-101B9          |            | Mammalia; Eutheria; Laurasiatheria; Carnivora; Feliformia       |
| <i>Loxodonta africana</i>     | NW_003573426 | Position78131854..78132400 | unplaced genomic scaffold |            | Mammalia; Eutheria; Afrotheria; Proboscidea                     |
| <i>Echinops telfairi</i>      | AAIY01712675 | Position127..684           | cont1.712676              |            | Mammalia; Eutheria; Afrotheria; Tenrecidae                      |
| <i>Procavia capensis</i>      | ABRQ01437563 | Position8031..8582         | cont1.437562              |            | Mammalia; Eutheria; Afrotheria; Hyracoidea                      |
| <i>Tupaia belangeri</i>       | AAPY01503776 | Position376..933           | cont1.503775              |            | Mammalia; Eutheria; Euarchontoglires; Scandentia                |
| <i>Dasypus novemcinctus</i>   | AAGV03077459 | Position30535..31089       | Contig77542               |            | Mammalia; Eutheria; Xenarthra; Cingulata                        |
|                               | AAGV03077459 | Position4841..5395         | Contig77542               |            |                                                                 |
|                               | AAGV03077459 | Position14089..14643       | Contig77542               |            |                                                                 |
|                               | ABVD01137885 | Position2170..2732         | cont1.137884              |            | Mammalia; Eutheria; Xenarthra; Pilosa                           |
| <i>Choloepus hoffmanni</i>    | DU289710     | Position260..554           | clone CH243-178E5         | fragment   | Mammalia; Eutheria; Laurasiatheria; Cetartiodactyla; Ruminantia |
|                               | DU364560     | Position217..518           | clone CH243-98I19         | fragment   |                                                                 |
| <i>Vicugna pacos</i>          | ABRR01027158 | Position1580..2137         | cont1.27157               |            | Mammalia; Eutheria; Laurasiatheria; Cetartiodactyla; Tylopoda   |
| <i>Myotis lucifugus</i>       | AAPE02035609 | Position10028..10575       | cont2.35608               |            | Mammalia; Eutheria; Laurasiatheria; Chiroptera                  |
| <i>Pteropus vampyrus</i>      | ABRP01261556 | Position5965..6522         | cont1.261555              |            | Mammalia; Eutheria; Laurasiatheria; Chiroptera                  |
